# Supplementary material for: Spectroscopic study on the impact of methylammonium iodide loading time on the electronic properties in perovskite thin films
Source: Royal Society of Chemistry journal article supplement (doi:10.1039/c5ta08262e), 2015-11-24
Supplement: c5ta08262e1.pdf [file c5ta08262e1.pdf]

## Supporting Information

### **Spectroscopic Study on the Impact of Methylammonium iodide Loading Time on the Electronic Properties in Perovskite Thin Films**

*Yuanhang Cheng<sup>1</sup>, Ho-Wa Li<sup>1</sup>, Jinfeng Zhang<sup>1,2</sup>, Qing-Dan Yang<sup>1</sup>, Taili Liu<sup>1</sup>,*

*Zhiqiang Guan<sup>1,2</sup>, Jian Qing<sup>1,2</sup>, Chun-Sing Lee<sup>1,2</sup>, Sai-Wing Tsang<sup>1\*</sup>*

<sup>1</sup>Department of Physics and Materials Science, City University of Hong Kong, Hong Kong SAR, P. R. China.

<sup>2</sup> Center of Super-Diamond and Advanced Films (COSDAF), City University of Hong Kong, Hong Kong SAR, P. R. China.

\*Corresponding author.

E-mail: [saitsang@cityu.edu.hk](mailto:saitsang@cityu.edu.hk) (S-W Tsang)

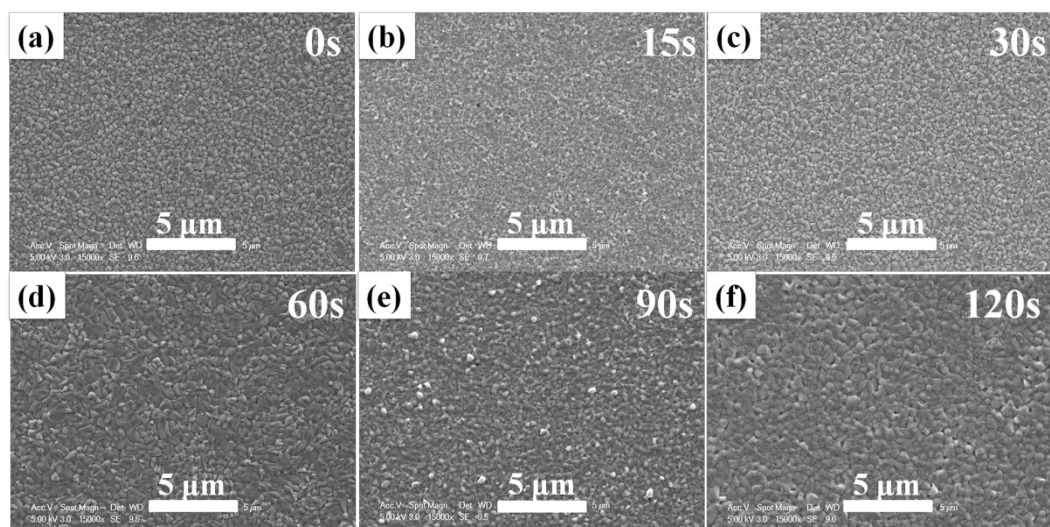

**Figure S1** SEM images of  $\text{CH}_3\text{NH}_3\text{PbI}_3$  films grown with loading MAI on  $\text{PbI}_2$  films for 0 s (a), 15 s (b), 30 s (c), 60 s (d), 90 s (e) and 120 s (f). The scale bar is 5  $\mu\text{m}$ .

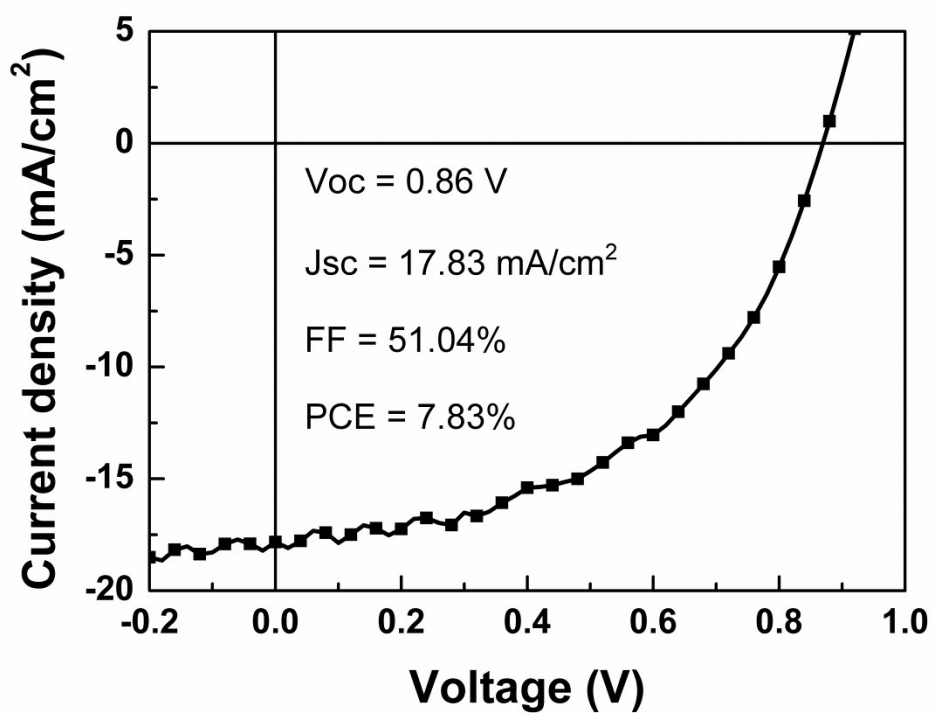

**Figure S2** Current density-voltage ( $J$ - $V$ ) characteristics of  $\text{CH}_3\text{NH}_3\text{PbI}_3$  perovskite device without BCP as cathode buffer layer (perovskite film was prepared with 60 s as MAI loading time).

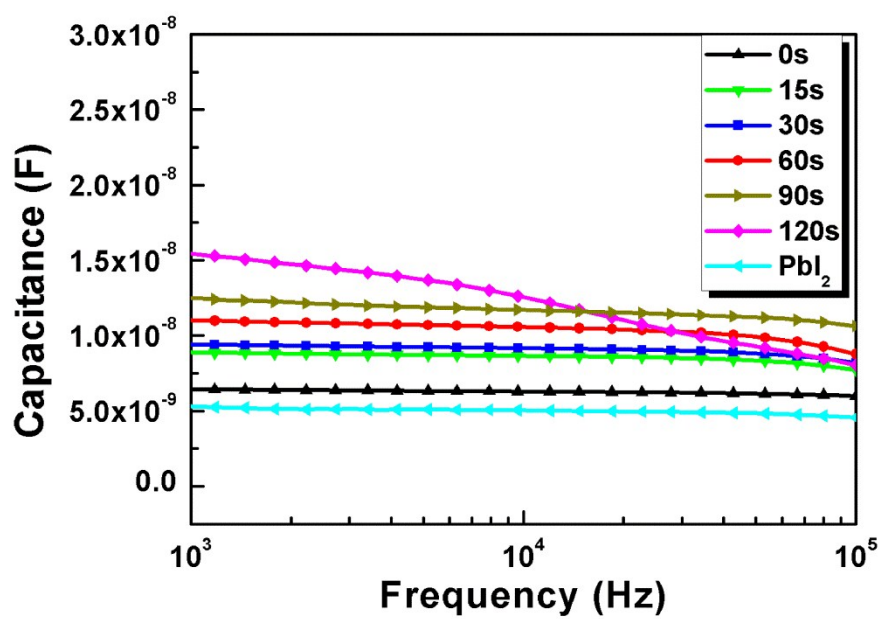

**Figure S3** Frequency dependent capacitance of  $CH_3NH_3PbI_3$  perovskite films prepared with different MAI loading times.

**Table S1** Summary of photovoltaic parameters of devices with reverse and forward scan directions prepared with different MAI loading times.

| Loading time (s) | Scan direction | $V_{oc}$ (V) | $J_{sc}$ (mA/cm <sup>2</sup> ) | FF (%) | PCE (%) |
|------------------|----------------|--------------|--------------------------------|--------|---------|
| 0                | Reverse        | 0.74         | 9.54                           | 27.4   | 1.94    |
|                  | Forward        | 0.82         | 9.51                           | 40.2   | 3.14    |
| 15               | Reverse        | 0.72         | 15.27                          | 25.2   | 2.77    |
|                  | Forward        | 0.86         | 14.72                          | 35.1   | 4.45    |
| 30               | Reverse        | 0.92         | 16.11                          | 43.8   | 6.51    |
|                  | Forward        | 0.94         | 16.03                          | 50.7   | 7.64    |
| 60               | Reverse        | 0.96         | 21.82                          | 74.3   | 15.58   |
|                  | Forward        | 0.98         | 21.62                          | 73.2   | 15.51   |
| 90               | Reverse        | 0.92         | 15.40                          | 55.1   | 7.81    |
|                  | Forward        | 0.94         | 16.47                          | 60.0   | 9.14    |
| 120              | Reverse        | 0.90         | 15.65                          | 49.79  | 7.05    |
|                  | Forward        | 0.95         | 16.70                          | 51.83  | 8.24    |

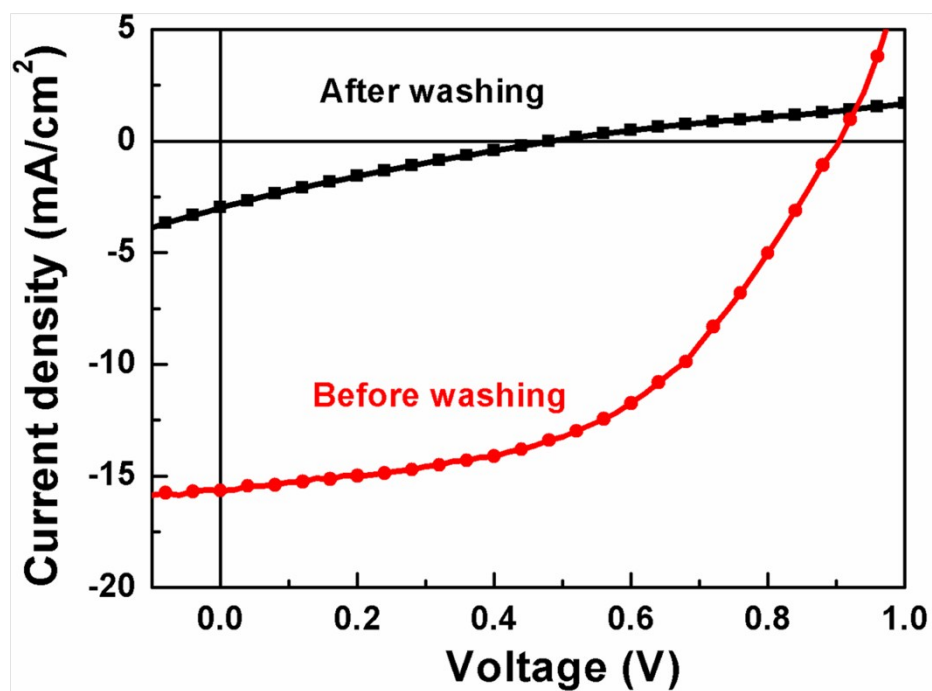

**Figure S4.** Current density-voltage ( $J-V$ ) characteristics of  $\text{CH}_3\text{NH}_3\text{PbI}_3$  perovskite solar cells prepared with 120 s MAI loading time before and after washing with IPA.
